# Supplementary material for: What Went Wrong with the IMMUNI Contact-Tracing App in Italy? A Cross-Sectional Survey on the Attitudes and Experiences among Healthcare University Students
Source: MDPI journal article supplement (doi:10.3390/life12060871), 2022-06-10
Supplement: s1 [file s1]

## **Section S1 – Sociodemographic characteristics**

1.1 Age: \_\_\_\_\_

1.2 Gender:

- ☐ Male
- ☐ Female
- ☐ Other
- ☐ I prefer not to declare

1.3 Field of study:

- ☐ Nursing science
- ☐ Physiotherapy

1.4 Year of study:

- ☐ 1
- ☐ 2
- ☐ 3
- ☐ Outside prescribed course

1.5 Nationality:

- ☐ Italy
- ☐ France
- ☐ Germany
- ☐ Other (*please specify*): \_\_\_\_\_

1.6 If you are an Italian citizen, please write your Italian Region: \_\_\_\_\_

1.7 With the financial resources at your disposal, how well do you get to the end of the month?

- ☐ I have many difficulties
- ☐ I have some difficulties
- ☐ Managing well enough
- ☐ Managing very well

1.8 What is your main source of health information?

- ☐ Mass media
- ☐ Social network
- ☐ Web
- ☐ Other (*please specify*): \_\_\_\_\_
- ☐ None

1.9 How often do you need to have someone help when you read instructions, pamphlets, or other written material from your doctor or pharmacy?

- ☐ Never
- ☐ Rarely
- ☐ Sometimes
- ☐ Often
- ☐ All the time

1.10 Do you suffer from any chronic condition?

- ☐ None
- ☐ Asthma
- ☐ Diabetes
- ☐ Cancer
- ☐ Autoimmune disease
- ☐ Other (*please specify*): \_\_\_\_\_

1.11 Have you ever been infected with SARS-CoV-2?

- ☐ No
- ☐ Yes, I have been asymptomatic
- ☐ Yes, I have had mild symptoms
- ☐ Yes, I have had moderate symptoms
- ☐ Yes, I have had severe symptoms

## Section S2 - COVID-19 perception and attitudes

2.1 Express your perceptions, attitudes, and feelings towards the pandemic

*Give a rating from 1= very low or not at all to 5= very high or extremely.*

|                                          | 1 | 2 | 3 | 4 | 5 |
|------------------------------------------|---|---|---|---|---|
| Fear of getting the SARS-CoV-2 infection |   |   |   |   |   |
| Fear of infecting others                 |   |   |   |   |   |
| Concern about COVID-19 emergency         |   |   |   |   |   |
| Depression                               |   |   |   |   |   |
| Anxiety                                  |   |   |   |   |   |
| Anger                                    |   |   |   |   |   |

2.2 Self-report your adherence to precautionary measures and agreement with the following statements.

*For each option bar the appropriate box, from 1= not at all to 5= extremely.*

|                                                              | 1 | 2 | 3 | 4 | 5 |
|--------------------------------------------------------------|---|---|---|---|---|
| How much do you comply with social distancing?               |   |   |   |   |   |
| How much do you comply with the use of masks?                |   |   |   |   |   |
| I trust the response of the institutions to the emergency    |   |   |   |   |   |
| I believe in the “lab-leak theory” of the origin of COVID-19 |   |   |   |   |   |

2.3 Has anyone ever advised you to download and use IMMUNI?

- ☐ No
- ☐ Yes, one of my relatives
- ☐ Yes, one of my friends
- ☐ Yes, my GP/another doctor
- ☐ Other (*please specify*): \_\_\_\_\_

2.4 Have you downloaded IMMUNI?

- ☐ Yes, immediately after its launch (June-August 2020)
- ☐ Yes, after last summer (September-November 2020)
- ☐ Yes, last winter (December 2020-February 2021)
- ☐ No

2.5 Are you still using IMMUNI on your phone?

- ☐ Yes
- ☐ No
- ☐ Not applicable

**Section S3A – For students who downloaded IMMUNI**

3A.1 What is the main reason why you downloaded IMMUNI App?

- ☐ Sense of duty
- ☐ Respect for others
- ☐ Fear of getting the infection
- ☐ Curiosity
- ☐ Other (please specify): \_\_\_\_\_

3A.2 What is your opinion on the following aspects of IMMUNI App?

*Tick the box that corresponds to your judgment, from 1 = very poor to 5 = excellent.*

|               | 1 | 2 | 3 | 4 | 5 |
|---------------|---|---|---|---|---|
| Privacy       |   |   |   |   |   |
| Ease to use   |   |   |   |   |   |
| Usefulness    |   |   |   |   |   |
| Intuitiveness |   |   |   |   |   |

3A.3 Have you ever received a contact notification?

- ☐ Yes
- ☐ No

3A.4 What did you do after receiving the notification?

- ☐ Not applicable
- ☐ I received and followed the advice provided by the app
- ☐ I received the advice, but I did not do anything

3A.5 Have you ever notified your positivity to SARS-CoV-2 through the App?

- ☐ Not applicable
- ☐ No, I was not able to
- ☐ Yes, I was given the CUN, and I entered the requested data on the app
- ☐ Yes, I provided the CUN to the healthcare professional who contacted me for contact-tracing purposes

3A.6 How do you judge the notification process?

- ☐ Very lacking
- ☐ Lacking
- ☐ Good
- ☐ Very good
- ☐ Not applicable

3A.7 What challenges did you face during the notification process?

- ☐ Not applicable
- ☐ I was unable to get the CUN
- ☐ I was unable to enter the CUN in the app even after calling the IMMUNI call center
- ☐ I was unable to enter the CUN in the app and I did not know that I could call the IMMUNI call center
- ☐ I did not have any difficulty
- ☐ Other (please specify): \_\_\_\_\_

**You have completed the questionnaire. Thank you for participating!**

**Section S3B – For students who did not download IMMUNI**

3B.1 What is the main reason why you did not download IMMUNI App?

- I do not think it is useful
- I did not know I had to download the app
- Technical problems (e.g., no smartphone, operating system incompatibility, battery problems, insufficient storage on the phone, etc.)
- I do not trust data management (privacy issue)
- I have heard of negative personal experiences
- Other (*please specify*): \_\_\_\_\_

3B.2 Indicate how much these measures would incentivize your app uptake.

*For each option, bar the appropriate box from 1=not at all to 5=definitely:*

|                                                                  | 1 | 2 | 3 | 4 | 5 |
|------------------------------------------------------------------|---|---|---|---|---|
| Information on how usage can impact transmission dynamics        |   |   |   |   |   |
| Information on the app's uptake among the population             |   |   |   |   |   |
| Making the app download mandatory                                |   |   |   |   |   |
| Opportunity to give feedback on the technical aspects of the app |   |   |   |   |   |
| Information about personal data collection and management        |   |   |   |   |   |
| Economic reward                                                  |   |   |   |   |   |

**You have completed the questionnaire. Thank you for participating!**
